# Supplementary material
Source: Springer Nature journal article supplement (https://www.springermedizin.de/resource/supplementary/12935_2006_147_MOESM6_ESM.pdf/9541184)

# MEF-12(1)

Relative Cyclin B1 / Cell

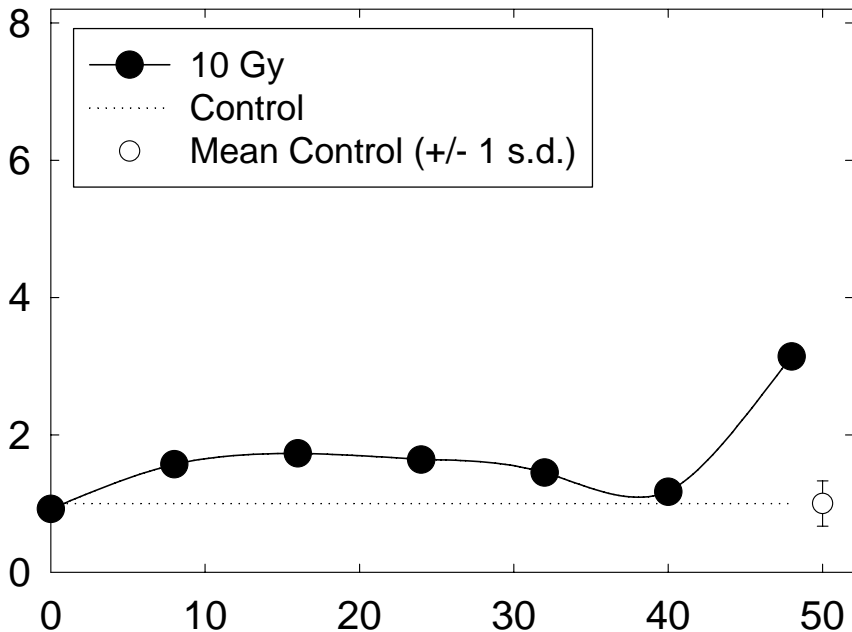

Hours After Irradiation

Supplement: MOESM6 [file 9541184]
